# Supplementary material
Source: publisher site journal article supplement (https://www.dovepress.com/article/556818)
Supplement: Supplementary file 1 [file Supplementary%20material%20Table.docx]

**Supplementary Table 1 TRGs**

| ASF1A | STN1 | ACD | NUDCD2 | LRRC18 | FOXK2 | PURA | FUS | TBCA |
| --- | --- | --- | --- | --- | --- | --- | --- | --- |
| ASF1B | OLA1 | ACYP2 | APOBEC3F | RPS4X | RAB7A | RAD21L1 | GAR1 | TBCD |
| ATM | ORC1 | TSPYL6 | DHFRL1 | RPS4Y1 | CDC23 | SETX | GATAD2B | TBL1X |
| ATR | ORC2 | NAF1 | TUBB | CNOT4 | VAMP3 | SHQ1 | GBE1 | TKT |
| ATRX | ORC4 | ZNF208 | NAIF1 | LGMN | POLR2D | SIRT2 | GEN1 | TPI1 |
| BLM | ORC5 | MPHOSPH6 | PAGE2 | TCHHL1 | SNRNP40 | SLX1A | GET4 | TUBB2A |
| CBX3 | ORC6 | DNA2 | CPNE2 | USP20 | MRPL49 | SMARCAL1 | GMNN | WARS |
| DAXX | OTUB1 | HRG | PHYHD1 | TRAPPC2 | ABCC1 | SNRPB | GMPS | WFS1 |
| ERCC4 | PA2G4 | IDH1 | NUDT14 | CREB5 | PIK3CD | SNRPD3 | RACK1 | RNF113A |
| FANCD2 | PABPC1 | RINT1 | BOD1L1 | NAA30 | MED12 | SNRPE | GNL3 | IFRD2 |
| FEN1 | PALB2 | TNKS1BP1 | CCDC137 | FOXP4 | GNL1 | SPO11 | GPKOW | HIST1H2AL |
| H3F3A | PARK7 | ZSCAN4 | C1orf174 | FOXP1 | PIGK | SUN1 | GRWD1 | FKBP6 |
| HMBOX1 | PARP1 | TP53RK | ANXA8L1 | RPS10 | ABCB6 | SUN2 | GTF3C3 | MADD |
| NSMCE2 | PARP4 | TPRKB | MICA | USP21 | ABCC9 | TCP1 | H2AFX | PEA15 |
| PCNA | PAXIP1 | MYEF2 | ASS1 | RPS11 | ARPC2 | TERB1 | H2AFY | CPNE3 |
| PIN1 | PCNP | HNRNPM | HNRNPK | FPGS | PRKD3 | TERB2 | H2AFY2 | NOL3 |
| PINX1 | PDCD4 | OSGEP | HSP90AB1 | RPS15A | PIK3CA | TFIP11 | HAT1 | CLIC3 |
| PML | PDCD6 | PIF1 | IDO1 | RPS16 | POLR2I | WRAP53 | HDAC1 | DOK2 |
| POT1 | PEBP1 | KMT2C | IPO5 | RPS17 | TLN1 | TNFRSF6B | HDAC2 | MAP7 |
| RPA1 | PES1 | KMT2B | OCM2 | RPS19 | TSG101 | RMRP | HDAC3 | TMSB4Y |
| RPA2 | PHF1 | SERBP1 | PKM | ABCC5 | HMG20B | MLX | HDAC4 | TMSB10 |
| RTEL1 | PHF20L1 | HABP4 | PRKCB | RPS21 | RNASEH2A | TFE3 | HDGF | DDX21 |
| SP100 | PIAS1 | YRDC | SRSF6 | ARF1 | PSMC4 | TFEB | HELZ | BCL7B |
| SUMO1 | PIAS3 | RBBP5 | SULT1C2 | LRRC63 | VAMP5 | TFEC | HIC1 | GPR52 |
| SUMO2 | PIR | ATAD5 | AIMP2 | BRMS1 | PSKH1 | RBBP4 | HINT2 | TRIP10 |
| TERF1 | PKMYT1 | RRAGA | EIF3G | RPS23 | RAB32 | RFWD2 | HIST1H2AA | HMGN3 |
| TERF2 | PLK1 | RRAGB | VGLL4 | RPS14 | RPL10A | KLF1 | HIST1H2BA | DDX23 |
| TERF2IP | PMS1 | TNIP3 | FAM131B | CHN1 | SEC63 | KLF12 | HIST1H2BB | XAGE2 |
| TERRA | PMS2 | TNIP2 | DDX39A | ARRDC2 | PIGN | KLF15 | HIST1H4H | BAG3 |
| TERT | PNKP | TNIP1 | DNPH1 | RPS27 | NUFIP1 | KLF17 | HIST3H3 | PRDX6 |
| TINF2 | POLA1 | MMS19 | HEXIM1 | RPS28 | SEC61A1 | KLF3 | HLTF | DHX38 |
| TOP3A | POLA2 | THOC7 | ARPP21 | CALML4 | POMT2 | KLF5 | HMGA1 | KEAP1 |
| UBE2I | POLD1 | PIAS4 | DDX19B | RRM1 | MRM2 | KLF6 | HMGB1 | RNF10 |
| XRCC6 | POLD2 | RPL13 | ACOT7 | CSTF3 | ATAD2 | KLF7 | HMGB1P10 | GFPT2 |
| CDKN1A | POLD3 | PBRM1 | TWF2 | ZNHIT3 | PPP2R1A | KLF8 | HMGB2 | DPP3 |
| DNMT1 | POLD4 | SAP30 | TOR1AIP1 | CABP1 | RBX1 | FOXN1 | HMGB3 | TSSC4 |
| HDAC7 | POLE | SAP30L | WIPI2 | ARL4A | SLC7A11 | FOXN2 | HNRNPA1 | BCAP31 |
| HMGN5 | POLE2 | CHMP4BP1 | KIF1BP | FOXK1 | PIK3R4 | FOXN3 | HP1BP3 | GPA33 |
| PARP2 | POLE3 | CHMP4A | BABAM1 | PARL | MDN1 | FOXN4 | HSD17B10 | STUB1 |
| SENP6 | POLE4 | MED18 | LGALSL | PRPS2 | PPM1F | FOXR1 | HUS1 | PAK4 |
| TEP1 | POLH | CCNL1 | MRTO4 | RPS4Y2 | LPIN2 | GATA1 | IDH3A | RTN3 |
| AASDHPPT | POLL | CCNC | THG1L | PNCK | IPO13 | GATA2 | INO80 | AKR1A1 |
| ACP1 | POLM | CCNL2 | MAGOHB | CHN2 | DHX34 | GATA3 | INO80B | TUBB3 |
| ACTR5 | POLR1B | CCNT1 | APPL2 | MLH3 | EIF4A3 | GATA4 | INO80C | HMGN4 |
| ACTR8 | POLR1C | CCNT2 | PPP6R3 | ACTR3B | PPM1E | GATA5 | INO80E | PAICS |
| ALYREF | POLR1E | FAM58A | CPPED1 | HSP90AA2P | USP33 | GATA6 | ISG15 | ARID3B |
| SLF1 | POLR2E | UBE2A | C19orf66 | INCENP | TLN2 | TRPS1 | ISG20 | TRIM16 |
| ANP32B | PPME1 | UBE2B | CEP85 | UEVLD | CDK12 | MECOM | ITGAX | GAS2L1 |
| ANP32E | PPP1CA | OSGEPL1 | NOL12 | GDAP1 | RTF1 | PRDM16 | KAT2A | RGS14 |
| APEX1 | PPP1CB | KMT2D | NUDT18 | XRN1 | CSTF2T | ZNF497 | KAT2B | RBBP9 |
| API5 | PPP1CC | SETD1A | PYM1 | WDR38 | RRP8 | ZNF837 | KDM1A | WDR4 |
| APLF | PPP1R10 | SETD1B | HDGFRP2 | SLC7A6 | UPF2 | YY1 | KDM4A | TOMM34 |
| ARF3 | PRIM1 | EZH1 | TXNDC17 | POMT1 | GPATCH4 | YY2 | KDM4B | OGFR |
| ARF4 | PRIM2 | EZH2 | PHYKPL | PNKD | RPS27L | ZFP42 | KDM4C | WDR5 |
| ARF5 | PRKDC | SIRT4 | C15orf57 | UBXN2B | MED31 | JAZF1 | KHDRBS1 | PACSIN2 |
| ARHGDIA | PRMT1 | SIRT5 | FAM122A | CDC16 | NAA20 | TEAD1 | KHSRP | AKR7A3 |
| ARID3A | PRMT2 | CHMP4C | ZC3H18 | ABCC6 | LSM7 | TEAD2 | KIF4A | NCDN |
| ARID4A | PRMT3 | CHMP7 | HEXIM2 | ARHGAP9 | LSM8 | TEAD3 | KMT2A | COTL1 |
| ARID4B | PRMT6 | NCBP2L | SIRPD | KDM6B | VPS28 | TEAD4 | KPNB1 | HAAO |
| ATRIP | PRPF19 | NCBP2 | REM2 | LRRIQ4 | TUBE1 | HIST1H3B | LASP1 | SH3BP1 |
| AURKA | PRPF31 | NAA11 | CNST | ASPG | DNAJB11 | HIST1H3C | LEMD2 | AIPL1 |
| AURKB | PRPF4B | NAA10 | PROSER2 | ARRDC5 | RAB9B | HIST1H3D | LGALS1 | FKBP8 |
| AZGP1 | PSMA7 | HIST1H4B | ZNF790 | ISCA1P1 | USP18 | HIST1H3E | LGALS7 | PGLS |
| BARD1 | PSMA8 | HIST4H4 | PDGFRA | RB1CC1 | CALML5 | HIST1H3F | LIG1 | SULT4A1 |
| BCCIP | PSMB6 | POLR2B | MORC3 | CDK10 | LRRC40 | HIST1H3G | LIG3 | CHMP2B |
| BRCA2 | PSMD10 | THOC5 | CDK2 | ZGRF1 | ELOVL2 | HIST1H3H | LIG4 | RPAP1 |
| BRIP1 | PSMD5 | TOX4 | RNF4 | PSMB11 | UBE2R2 | HIST1H3I | LMNB1 | CCDC9 |
| BUB3 | PSME3 | THOC1 | SENP2 | RAP1GDS1 | IWS1 | HIST1H3J | LONP1 | OR2H1 |
| BZW1 | PTMS | THOC2 | ZNF451 | ELOVL7 | GPATCH1 | HIST1H4C | LRIF1 | GNMT |
| C14ORF166 | RAB10 | THOC6 | HNRNPA2B1 | ASH2L | TSR1 | HIST1H4D | LRRC41 | SULT1B1 |
| FAAP100 | RAB1B | THOC3 | RAP1A | ABCC4 | PNPO | HIST1H4E | LRWD1 | C19orf53 |
| FAAP24 | RAB35 | CTC1 | SENP1 | CDC27 | DHX32 | HIST1H4F | MAT2B | DBNL |
| C1QBP | RAB5C | ACAT2 | SENP3 | FOXP3 | DNAJC11 | HIST1H4I | MBD3 | PHPT1 |
| RTCB | RAB6A | ACTB | SENP5 | HHAT | SMU1 | HIST1H4J | MCM2 | PACSIN3 |
| TTI2 | RAD1 | ACY1 | SENP7 | ADK | LSG1 | HIST1H4K | MCM3 | PACSIN1 |
| CACYBP | RAD17 | ADPRH | CASP7 | PPP6C | FOXJ2 | HIST1H4L | MCM4 | TNPO2 |
| CAND1 | RAD18 | AHCY | PGD | ADSS | ARHGAP15 | HIST2H4A | MCM5 | HDGFRP3 |
| CARM1 | RAD21 | AKT1 | MAP4 | RACGAP1 | LRRC59 | HIST2H4B | MCM6 | SBDS |
| CBFB | RAD23B | ALDH3A1 | FBP1 | SLC7A7 | WDR5B | ALPL | MCM7 | PIPOX |
| CBX1 | RAD50 | ALDOA | PAFAH1B3 | SLC25A19 | RNF20 | CCNB1 | MCPH1 | BIN2 |
| CBX5 | RAD51 | AMPD2 | EVL | GINS3 | SLC7A10 | CTSC | MCRS1 | ISYNA1 |
| CCAR2 | RAD51AP1 | AMPH | CFL1 | SLC7A9 | ZMIZ1 | COCH | MDC1 | SCLY |
| POLR1A | RAD51B | SLC25A6 | ADA | USP8 | CAMK1G | DHFR | MKI67 | C9orf78 |
| CCNA2 | RAD51C | ANXA2 | TRIM15 | SMARCA4 | HHATL | DSG2 | MLH1 | PRMT7 |
| CCT2 | RAD51D | ANXA4 | AK1 | ATF7 | AARS2 | GABRB3 | MORC4 | KLHDC4 |
| CCT4 | RAD52 | ANXA5 | TUBB4B | MOV10 | ARHGAP21 | GLDC | MRE11 | EPS8L1 |
| CCT5 | RAD54B | ARRB1 | NCBP1 | KARS | VPS18 | HMMR | MSH2 | RPP25 |
| CCT7 | RAD54L | ZFP36L1 | CPSF4 | DNAJA4 | RRAGD | KCNS3 | MSH3 | BANP |
| CDC25A | RAD9A | CALD1 | GRHL2 | AHCYL2 | TSPYL4 | LCK | MSH4 | PGM2 |
| CDC25B | RANP1 | CALML3 | HNRNPD | ELOVL6 | TSPYL2 | PDCD2 | MSH5 | UFSP2 |
| CDC73 | RB1 | CARS | HSP90AA1 | HYOU1 | RAB38 | RARRES2 | MSH6 | TRMT1 |
| CDCA8 | RBBP7 | CKB | NOS3 | RPS27A | SUDS3 | ST6GAL1 | MTA1 | LYAR |
| CDK1 | RBBP8 | CLK3 | RFPL3 | ARHGAP26 | RPS18 | SORL1 | MTF2 | ENAH |
| CEP164 | RBL1 | CRK | SCYL1 | RAB29 | TSPY2 | IFITM1 | MUS81 | LANCL2 |
| CGGBP1 | RBL2 | CRYBB1 | ARID1A | DOLPP1 | GIGYF1 | NFE2L3 | MUTYH | RGMA |
| CHAF1B | RBM14 | CRYGS | DEK | PTGES3L-AARSD1 | ELOVL4 | TRIM22 | NABP1 | AKR1B10 |
| CHEK1 | RBM8A | CRYM | KLF2 | FZR1 | ARV1 | LYPLA1 | NABP2 | ANKMY2 |
| CHEK2 | RCC1 | DBN1 | SNAI1 | ANAPC7 | UPF3B | PIM2 | NACA | DDX24 |
| CHFR | RCC2 | DCX | TAL1 | PDK3 | UPF3A | RRAS2 | NAMPT | CAMK1D |
| CHMP4B | RCOR1 | DPYSL3 | VDR | TGFBRAP1 | MRPL34 | PASK | NANS | RTN4 |
| CHTF18 | RECQL | EEF1D | AVPR1B | SEC61A2 | DDX50 | FRAT2 | NAT10 | CORO1B |
| CIRBP | RECQL4 | EIF4B | CAMK2A | UBTFL1 | NOC4L | CECR1 | NBN | KIAA1191 |
| CLIC1 | RECQL5 | CTTN | CASK | NDOR1 | DSCC1 | NUP107 | NCAPG | PRX |
| CLSPN | REV1 | ENO2 | CDKL2 | ABCC3 | ARHGAP10 | SLC39A10 | NDC80 | RBKS |
| CMPK1 | RFC1 | ENSA | DLG2 | EFCAB3 | LRRK1 | NLGN4X | NSMCE3 | PDLIM2 |
| CPSF6 | RFC2 | EPB41L1 | DLG4 | SIN3A | ERMP1 | LRRN1 | NELFB | C12orf43 |
| CREBBP | RFC3 | EPHX2 | DNAJC3 | CDC20B | ARL14 | ANOS1 | NFRKB | AHNAK |
| CSE1L | RFC4 | FABP2 | EDN2 | RNF222 | ILKAP | TMX1 | NHEJ1 | C1orf35 |
| CSNK2A1 | RFC5 | FES | EIF2AK4 | ARHGAP27 | TUBB1 | AKIRIN1 | NHP2 | RPAP3 |
| CSRP1 | RIF1 | NR5A1 | FGFR3 | MPND | ISCA1 | THEMIS2 | NIPBL | KCTD17 |
| CTBP1 | RMI1 | GAGE5 | GNE | POC1A | ARPC5L | MIS18BP1 | NIPSNAP1 | CCM2 |
| CTDP1 | RMI2 | GAMT | KSR2 | MOV10L1 | SYDE2 | ZNF148 | NOP10 | FERMT3 |
| DBF4B | RNF8 | GAPDH | LCP2 | TUBB8 | PRPF38A | UBE2D3 | NOP9 | TBC1D10A |
| DCLRE1A | RPA3 | GSS | MAP3K4 | LRCH1 | BRMS1L | ZNF703 | NOSIP | ZNF414 |
| DCLRE1B | RPAIN | HIST1H1A | MAPK1 | DHX16 | VPS25 | ACLY | NR2C1 | AFAP1L2 |
| DCLRE1C | RPRD1B | HAGH | MAPK14 | CDK5 | EFCAB7 | ACTN1 | NR2C2 | PTPN5 |
| DCTN2 | RUVBL1 | HCLS1 | NEK2 | ACTR3C | ABCC11 | AP2A2 | NR2F1 | SCRN2 |
| DDB1 | RUVBL2 | HGD | NEK6 | TSPY4 | LRCH3 | ABCD1 | NR2F6 | LRSAM1 |
| DDX1 | SAE1 | HLCS | NEK7 | RAB7B | RHPN2 | ATP2B1 | NRIP1 | PAGE5 |
| DDX39B | SARNP | HMGN1 | NEK8 | CALM1 | PSKH2 | ATP2B3 | NSMCE4A | SYAP1 |
| DDX5 | 02_Sep | HMGN2 | RAC1 | EIF2B3 | ABCC12 | DST | NSUN2 | NXNL1 |
| DHX15 | SERPINB12 | HMOX1 | RPS6KA5 | CDK16 | TSPYL5 | CENPF | NUDC | CCDC43 |
| DKC1 | SET | HNMT | RYK | CDK17 | HELB | CSNK2A2 | NUDT21 | C17orf49 |
| DNAJA1 | SFR1 | HOXA3 | AKAP8 | ZNHIT6 | RHPN1 | CSNK2B | NUMA1 | JSRP1 |
| DNAJA2 | SGO1 | HSPA1A | ANGPT4 | FOXO4 | MED12L | CYLC2 | HSP90AB2P | LRRC25 |
| DNAJB1 | SEM1 | HSPA6 | BDKRB2 | EFCAB9 | TADA1 | DMD | TDRD12 | CDK15 |
| DNAJC8 | SHMT1 | IL1RN | BMP2K | FOXP2 | EXOSC6 | DOCK2 | TDRD3 | SLC7A8 |
| DNAJC9 | SIMC1 | IVL | CAMK2G | PPP2R1B | DQX1 | ATN1 | TDRD5 | ARPC5 |
| DNMT3A | SIRT1 | RPSA | CD7 | VAMP4 | ARL11 | ERH | TDRD6 | PSMD11 |
| DNMT3B | SIRT6 | LDHA | CDKN2B | C1D | SLC7A13 | FHL1 | TDRD7 | ARHGAP12 |
| DNTT | SKP1 | LDHB | CERK | DHX35 | FLCN | GTF2A1 | TDRD9 | TFAM |
| DUT | SLX4 | LTA4H | DCK | TNPO3 | ELOVL3 | GTF2A2 | TDRKH | ABCB7 |
| E2F1 | SLX4IP | MAGEA4 | DMPK | RAB9A | LRR1 | HK1 | TELO2 | PSMD6 |
| E2F2 | SMARCA1 | MDH1 | DTYMK | TSPY1 | ARHGAP42 | IVD | TERC | RRAGC |
| E2F3 | SMARCA5 | MPG | DUSP10 | FOXJ3 | PPM1K | KPNA2 | TFPT | AAR2 |
| E2F4 | SMARCC2 | MSN | EPHA4 | ABCC10 | NAGS | MARK3 | TFRC | ISCA2 |
| ECT2 | SMC1A | MT1X | FGFR4 | ARHGAP23 | PCSK9 | MECP2 | TMEM109 | TRAP1 |
| EDF1 | SMC3 | MT3 | GAP43 | DHX33 | TUBB2B | MYH9 | TMEM201 | ACTR3 |
| EFTUD2 | SMC5 | MVK | IKBKAP | POC1B | ARL5B | MYH10 | TNKS | PDK1 |
| EID3 | SMC6 | NAP1L1 | IRAK1 | PDK2 | ARRDC4 | MYO1C | TNKS2 | RHBDL1 |
| EIF4H | SMCHD1 | NASP | JAK2 | RNF7 | PHLPP1 | MYO10 | TOP1 | VPS36 |
| EIF5A | SMG1 | NCL | MALT1 | RPS10-NUDT3 | NAT16 | NME4 | TOP2A | SIGMAR1 |
| EIF5A2 | SMG5 | NEFL | MAP3K1 | WBSCR22 | USP50 | OPA1 | TOP2B | PIK3CG |
| ELAVL1 | SMG6 | PRDX1 | MAP3K2 | PRPS1 | TSEN54 | PCBP1 | TOP3B | ARL4C |
| EMD | SMG7 | PALM | MAP3K3 | COG3 | ATG16L1 | PCMT1 | TOPBP1 | TSPY10 |
| EME1 | SND1 | PCP4 | MAP3K5 | EIF4A1 | CALM1P1 | PFKL | TP53BP1 | GAPVD1 |
| ERCC1 | SNRPA1 | PDE1B | MAP4K3 | BNIP1 | HSP90AA4P | PLAT | TPR | EIF3J |
| ERCC2 | SNW1 | PEPD | MAPK3 | NSFL1C | HSP90AA5P | PLOD1 | TREX1 | LEO1 |
| ERCC3 | SOD2 | PFKP | MAPK8 | RNF40 | HSP90AB3P | PLOD2 | TREX2 | HSPH1 |
| ERCC5 | SP110 | PGM1 | MAPKAPK5 | ATAD2B | HSP90AB4P | PPP2CA | TRIM28 | ANAPC4 |
| ESRRA | SRP14 | PNMT | MET | AHCYL1 | RPS10P5 | PPP2CB | TRIP13 | GAK |
| ETAA1 | SRSF9 | PPM1G | MPZL1 | ELOVL5 | RPS4XP21 | PSMA2 | TTI1 | RABGEF1 |
| ETFA | SSB | PPP1R2 | NEK4 | FOXM1 | TSPY26P | REV3L | UAP1 | CDK14 |
| ETHE1 | SSRP1 | MAP2K3 | NTRK1 | HIP1 | TSPY6P | RING1 | UBA1 | SETSIP |
| EXO1 | STAG1 | PTMA | PCK1 | TSPY8 | TRAPPC2B | RNF2 | UBR5 | TEX2 |
| FAM175A | STAG2 | PEX5 | PI4K2B | USP2 | UBTFL6 | BRD2 | UBTF | PIK3C2G |
| FAM50A | STIP1 | MAP4K2 | PIK3C2B | PRPSAP2 | ARHGAP45 | RPS2 | UBXN1 | GMIP |
| FAM84A | STOML2 | RABIF | PKIB | LRCH2 | FAM197Y5 | RPS6 | UCHL1 | PHLPP2 |
| FAM84B | SUMO3 | RBMY1A1 | PPP1R1B | PRPF4 | FAM197Y1 | RPS8 | UIMC1 | TUBB4A |
| FANCA | SUPT16H | RGS3 | PRKAR2A | CDC20 | APAF1 | RYR2 | UPF1 | SMARCA2 |
| FANCB | SUV39H1 | RPL19 | PRKAR2B | PIK3CB | TEX13A | S100A7 | USP7 | HAGHL |
| FANCC | SUV39H2 | S100P | PRKCQ | ATF2 | TEX13B | S100A8 | VCP | FOXO6 |
| FANCE | KMT5B | MAPK12 | PRKCSH | ELOVL1 | PABPC1L2A | SFPQ | WDR61 | CDK11B |
| FANCF | KMT5C | SARS | PRKD2 | USP39 | PABPC1L2B | SNRNP70 | WDR82 | KDM6A |
| FANCG | SWI5 | SH3GL2 | PTPRG | GDAP1L1 | SART3 | SNRPD1 | WEE1 | DARS |
| FANCI | TAF15 | SNCG | RAPGEF3 | PAF1 | PPM1N | TAF2 | WRN | VAMP1 |
| FANCL | TAGLN2 | SOAT1 | ROCK1 | DNAJC6 | AMPD1 | TBX1 | WRNIP1 | SIN3B |
| FANCM | TARDBP | SOX5 | ROCK2 | UTY | AMPD3 | TF | XPO1 | DDX46 |
| FBL | TCEA1 | SRM | RPS6KA4 | CLPB | GMDS | TRPC5 | XRCC1 | CABP4 |
| FBXO18 | TCOF1 | SUPT5H | RPS6KB2 | CDK8 | UAP1L1 | UGDH | XRCC2 | SYDE1 |
| FH | TDP1 | SYK | SEPHS2 | CDK9 | STX10 | UTRN | XRCC3 | ZMIZ2 |
| FKBP5 | TDRD1 | TAGLN | SOCS1 | LPIN1 | STX6 | SF1 | XRCC4 | CDK19 |
| FUBP1 | TDRD10 | TALDO1 | SPA17 | AARSD1 | STX8 | USP9X | XRCC5 | VPS39 |
| USF1 | WT1 | ZBTB48 | BAZ2A | KLF4 | CTNNB1 | TEN1 | ORC3 | ETV4 |
| LPIN3 | PSMD12 | AHSA1 | AARS | PSMD8 | GCSH | FOSL2 | USF2 | NR1H3 |
| DHX8 | SNF8 | NAA35 | TRIM23 | SMARCC1 | ARHGAP35 | GTF2B | XBP1 | TCEAL7 |
| HIP1R | HSPA4L | PIAS2 | ARL4D | SMARCE1 | EHMT1 | HNF4A | ZNF32 | ANKLE1 |
| TUBB6 | XRN2 | ARRDC3 | ARF6 | TNNC2 | KCTD16 | MAX | FOSL1 | CCDC155 |
| PTPN23 | ARRDC1 | CALM3 | EIF4A2 | TNNC1 | MASTL | MXI1 | HMGA2 | CCNE1 |
| HMG20A | TRAPPC4 | DAW1 | FOXO1 | HSP90B1 | NCAPD3 | MYF5 | ATF6 | CCNE2 |
| RHBDL2 | CABP2 | PRKD1 | HSPA4 | TSPYL1 | PHAX | MYF6 | BCL11A | CCT3 |
| CALM2 | ATG16L2 | VAMP2 | JUNB | SLC7A5 | TBX15 | MYOG | MYOCD | CCT6A |
| RABL2A | CAMKV | RHBDL3 | OGG1 | PPM1D | TENM3 | NFKB2 | ZBTB9 | CCT8 |
| CSTF2 | ADSSL1 | CALML6 | OPHN1 | CAMK1 | AHR | REL | KLF9 | CDC45 |
| PIK3C3 | GPS1 | PRPSAP1 | CDK18 | CDK13 | ATF1 | RELB | NFATC1 | CERS1 |
| SP140L | SUZ12 | PDXK | PDK4 | VAMP8 | FOXL2 | REST | POU5F1 | DHX36 |
| GSTZ1 | AHSA2 | FOXF2 | PFDN1 | FOXH1 | CEBPA | TAF9 | PPARG | DMC1 |
| CDK11A | PIK3C2A | FOXJ1 | POLR2G | PSMB8 | FOXD2 | TBX2 | ZBTB16 | DOT1L |
| TXNIP | CNPPD1 | FOXO3 | PSMC3 | MED14 | FOSB | TFAP2C | ZEB2 | DPY30 |
| TCF7 | TCF7L2 | TFAP2A | TFAP2B | TFAP4 | TP53 | TP73 | YWHAB | ESR1 |
| DUSP11 | PRDX4 | SDF2L1 | TBC1D15 | OSBPL11 | BMP7 | RIC8A | YWHAE | ESR2 |
| IRS4 | PRDX3 | KIAA1429 | NT5DC2 | RAVER1 | CACNA1B | DBNDD1 | YWHAG | ETS1 |
| DDX3Y | CLASRP | CHD5 | PYCRL | MACROD2 | CYP2E1 | RBFA | YWHAQ | ETS2 |
| PABPC4 | ATXN2L | SAP30BP | KCTD15 | RBM33 | FOXD4 | TRIM7 | YWHAZ | ETV1 |
| MCM3AP | CEP131 | REPIN1 | DHX40 | CFAP58 | FRG1 | SCGB1C1 | ZBTB44 | EWSR1 |
| MYOM2 | FBXO21 | RBM15B | SLTM | U2AF1L4 | GAS8 | CHAMP1 | ZCCHC7 | FOS |
| SRSF11 | ZC3H13 | YTHDF2 | SNX22 | RSBN1L | PCNT | IQSEC3 | ZMYM2 | GLI1 |
| FXR2 | GPATCH8 | LARP7 | EDC3 | YTHDF3 | PSMD13 | CTAG1A | ZNF827 | GLI2 |
| TBPL1 | CYFIP1 | YTHDF1 | GRPEL1 | RALGAPA1 | SDHA | CTAG1B | ZSWIM7 | HIF1A |
| KIAA0430 | GANAB | C20orf27 | TMPRSS13 | RASGEF1C | SLC6A12 | CTAG2 | AR | HOXA7 |
| G3BP2 | SYNE2 | DARS2 | LDOC1L | GCOM2 | ZNF140 | LAGE3 | BHLHE40 | IKZF1 |
| SEC16A | KIF13B | CHD7 | POLDIP3 | KIAA2022 | DOC2B | PRMT5 | BRCA1 | IRF1 |
| USP15 | SYNE1 | BAIAP2L1 | ZGPAT | ZKSCAN4 | UBE2M | TMED10 | CTCF | JUN |
| THRAP3 | ARHGEF18 | ARHGAP20 | TRIM47 | TMEM173 | ZMYND11 | CEBPB | CTCFL | JUND |
| AASS | MACF1 | DHX37 | ZC3HAV1L | SETDB1 | DIP2C | BCKDK | E2F5 | MAD1L1 |
| SF3B4 | SKIV2L2 | CHD8 | ARMC6 | EP300 | SIRT3 | PSMB5 | E2F6 | MAZ |
| SEC24B | SRRM2 | EEFSEC | PAXBP1 | HDAC9 | SH3YL1 | PRPS1L1 | EGR1 | MBD2 |
| PITRM1 | ZNF281 | MCCC2 | OSBPL9 | USP22 | DUSP22 | YBX3 | EPAS1 | MEN1 |
| RUNX2 | SMAD3 | SP1 | SP3 | STAT3 | STAT5A | PLCB2 | CSNK1G2 | NLRP2 |
| SPHK2 | ACAD10 | PGRMC1 | RPL23 | RPL26L1 | PAFAH1B1 | PLCB3 | CSNK1G3 | NSMCE1 |
| SRC | NADK | RPN1 | DDX17 | RPL17 | CFTR | PLCB4 | TTBK1 | NUP98 |
| STK16 | LOC100421108 | EIF5B | DLST | CTNNA1 | POR | PLCD1 | TTBK2 | MITF |
| STK19 | ILF3 | ATP5A1 | CDC37 | IPO8 | RPL34 | PLCD3 | VRK1 | MXD1 |
| TNIK | BASP1 | RPL26 | RPL23A | WDHD1 | CHTF8 | PLCD4 | VRK2 | MYB |
| UGP2 | ATP5O | RPL27 | NAA15 | REEP5 | RABL2B | PLCE1 | VRK3 | MYC |
| YES1 | DLAT | RPLP1 | CKAP4 | GARS | SP140 | PLCG1 | ANAPC1 | MYCN |
| STK26 | GLG1 | ABCF1 | APEH | PPP1R7 | ACTR2 | PLCG2 | ARHGEF28 | MZF1 |
| STRADA | DAP3 | DDX3X | DHX9 | PHGDH | VPS54 | PLCH1 | CENPO | NFAT5 |
| MAPK15 | RPN2 | NPM1 | ATP6V1A | ALDH2 | WDR31 | PLCH2 | CMTR1 | NFATC2 |
| COQ8B | PC | FARSA | RPL31 | ANXA1 | PSMA1 | PLCL1 | FLI1 | NFKB1 |
| CDK20 | CAPRIN1 | RPL27A | RPL36 | SERPINH1 | CNOT2 | PLCL2 | DYDC1 | NVL |
| PAK5 | G3BP1 | RPS20 | PDAP1 | PSPH | FXN | PLCZ1 | DYDC2 | PARM1 |
| MAST1 | IGF2BP1 | ATP2A2 | RPL10 | PSAT1 | TRMT5 | PGS1 | GNL3L | PARP3 |
| BRSK2 | ATP1A1 | KRT10 | EIF5 | OXCT1 | DMAP1 | PDS5A | GREM1 | PTGES3 |
| IP6K3 | PAPSS1 | NONO | TPT1 | GSPT1 | MED13 | PDS5B | HDAC8 | RELA |
| EPHA6 | FBXO22 | SLC3A2 | SYNCRIP | ASNS | MED13L | MRPS11 | HIST1H3A | NFX1 |
| APPL1 | HNRNPC | ATP5B | ILF2 | ALDH1A1 | BET1 | RIDA | HIST1H4A | NR2F2 |
| IQCH | IGF2BP2 | RPL21 | RPLP2 | PUS7 | BET1L | CSNK1A1 | HNRNPU | PAX5 |
| PPP1R17 | ATP5F1 | FKBP3 | RPS7 | PKLR | SLC25A33 | CSNK1A1L | LEMD3 | PAX8 |
| RPRD1A | IGF2BP3 | AIFM1 | RPL12 | ABCC8 | SLC25A36 | CSNK1D | LSM11 | PITX1 |
| MAP2K7 | SLC25A5 | HNRNPCL1 | HNRNPA0 | UROS | DHDDS | CSNK1E | MAJIN | MEI1 |
| TPRXL | MARCKS | GIGYF2 | YBX1 | ABCC2 | PLCB1 | CSNK1G1 |  |  |

**Supplementary Table 2 PCR conditions**

| **Reaction of qPCR** | |
| --- | --- |
| Component | Volume |
| cDNA | 3ul |
| 2xUniversal Blue SYBR Green qPCR Master Mix | 5ul |
| Forward primer (10μM) | 1ul |
| Reverse primer (10μM) | 1ul |
|  |  |

|  | temperatures | times |
| --- | --- | --- |
| Pre denaturation | 95℃ | 1min |
| denaturation | 95℃ | 20s |
| annealing | 55℃ | 20s |
| extend | 72℃ | 30s |
|  | |  |
| **Detailed information of primers** | | |
| primers | | sequences |
| NTSR1 F | | CAACCTCGTCTCTGCCAACT |
| NTSR1 R | | CAGCCTAGTACAGCGTCTCG |
| GPR161 F | | GAGAGACATGGAAAAGGCGA |
| GPR161 R | | ATGCTGGACGACTCCTCTTG |
| internal reference-GAPDH F | | ATGGGCAGCCGTTAGGAAAG |
| internal reference-GAPDH R | | AGGAAAAGCATCACCCGGAG |

**Supplementary Table 3 Software packages and their versions.**

| Package | Version |
| --- | --- |
| xCell | 1.1.0 |
| ggplot2 | 3.5.1 |
| WGCNA | 1.73 |
| limma | 3.56.2 |
| ggVolcano | 0.0.2 |
| ComplexHeatmap | 2.16.0 |
| VennDiagram | 1.7.3 |
| clusterProfiler | 4.8.3 |
| Cytoscape | 3.9.1 |
| psych | 2.4.6.26 |
| rms | 6.8-1 |
| pROC | 1.18.5 |
| rmda | 1.6 |
| enrichplot | 1.20.3 |
| Cytoscape | 3.8.2 |
| Graphpad Prism | 8 |
| e1071 | 1.7- 16 |

**Supplementary Table 4 GO enrichment results**

|  | Category | ID | Term | Genes | adj_pval |  |
| --- | --- | --- | --- | --- | --- | --- |
| GO:0000083 | BP | GO:0000083 | regulation of transcription involved in G1/S transition of mitotic cell cycle | CDK5, E2F2 | 0.000303651993341737 | |
| GO:0097164 | BP | GO:0097164 | ammonium ion metabolic process | HNMT, ALDH2 | 0.00033233321845155 | |
| GO:1903307 | BP | GO:1903307 | positive regulation of regulated secretory pathway | CDK5, GATA1 | 0.00128012398873241 | |
| GO:2001234 | BP | GO:2001234 | negative regulation of apoptotic signaling pathway | TAF9, GATA1, CTTN | 0.00250091141846731 | |
| GO:0045921 | BP | GO:0045921 | positive regulation of exocytosis | CDK5, GATA1 | 0.00398513972186187 | |
| GO:0097061 | BP | GO:0097061 | dendritic spine organization | CDK5, CTTN | 0.00398513972186187 | |
| GO:0072332 | BP | GO:0072332 | intrinsic apoptotic signaling pathway by p53 class mediator | TAF9, E2F2 | 0.00428241189933048 | |
| GO:0051591 | BP | GO:0051591 | response to cAMP | GATA1, CARM1 | 0.00490692748567071 | |
| GO:0030516 | BP | GO:0030516 | regulation of axon extension | CDK5, CTTN | 0.00501486921909327 | |
| GO:0106027 | BP | GO:0106027 | neuron projection organization | CDK5, CTTN | 0.00501486921909327 | |
| GO:0006576 | BP | GO:0006576 | biogenic amine metabolic process | HNMT, ALDH2 | 0.005800981150834 | |
| GO:2001237 | BP | GO:2001237 | negative regulation of extrinsic apoptotic signaling pathway | GATA1, CTTN | 0.00603531997412672 | |
| GO:0061387 | BP | GO:0061387 | regulation of extent of cell growth | CDK5, CTTN | 0.00676400132981122 | |
| GO:0006367 | BP | GO:0006367 | transcription initiation at RNA polymerase II promoter | TAF9, E2F2 | 0.0075307687139147 | |
| GO:0010506 | BP | GO:0010506 | regulation of autophagy | PIK3C3, CDK5, CTTN | 0.0076645523169828 | |
| GO:0031532 | BP | GO:0031532 | actin cytoskeleton reorganization | CDK5, CTTN | 0.00792827051292055 | |
| GO:0009308 | BP | GO:0009308 | amine metabolic process | HNMT, ALDH2 | 0.00833509745300798 | |
| GO:0048675 | BP | GO:0048675 | axon extension | CDK5, CTTN | 0.00861146402783533 | |
| GO:0043200 | BP | GO:0043200 | response to amino acid | PIK3C3, TAF9 | 0.00875118472089934 | |
| GO:0051098 | BP | GO:0051098 | regulation of binding | CDK5, GATA1, CARM1 | 0.00899671099033915 | |
| GO:1901653 | BP | GO:1901653 | cellular response to peptide | PDK4, CDK5, KLF1 | 0.00940085757323974 | |
| GO:2001233 | BP | GO:2001233 | regulation of apoptotic signaling pathway | TAF9, GATA1, CTTN | 0.00981558020306898 | |
| GO:0046683 | BP | GO:0046683 | response to organophosphorus | GATA1, CARM1 | 0.010054364942309 | |
| GO:0030218 | BP | GO:0030218 | erythrocyte differentiation | KLF1, GATA1 | 0.0102041964658682 | |
| GO:1903305 | BP | GO:1903305 | regulation of regulated secretory pathway | CDK5, GATA1 | 0.0102041964658682 | |
| GO:0001101 | BP | GO:0001101 | response to acid chemical | PIK3C3, TAF9 | 0.0111240639496924 | |
| GO:0034101 | BP | GO:0034101 | erythrocyte homeostasis | KLF1, GATA1 | 0.0115973144915845 | |
| GO:0000447 | BP | GO:0000447 | endonucleolytic cleavage in ITS1 to separate SSU-rRNA from 5.8S rRNA and LSU-rRNA from tricistronic rRNA transcript (SSU-rRNA, 5.8S rRNA, LSU-rRNA) | RPS21 | 0.0117592260511478 | |
| GO:0000492 | BP | GO:0000492 | box C/D snoRNP assembly | TAF9 | 0.0117592260511478 | |
| GO:0006086 | BP | GO:0006086 | acetyl-CoA biosynthetic process from pyruvate | PDK4 | 0.0117592260511478 | |
| GO:0006547 | BP | GO:0006547 | histidine metabolic process | HNMT | 0.0117592260511478 | |
| GO:0030242 | BP | GO:0030242 | autophagy of peroxisome | PIK3C3 | 0.0117592260511478 | |
| GO:0031125 | BP | GO:0031125 | rRNA 3'-end processing | RPS21 | 0.0117592260511478 | |
| GO:0042135 | BP | GO:0042135 | neurotransmitter catabolic process | HNMT | 0.0117592260511478 | |
| GO:0010977 | BP | GO:0010977 | negative regulation of neuron projection development | CDK5, CARM1 | 0.0122419844677889 | |
| GO:0014074 | BP | GO:0014074 | response to purine-containing compound | GATA1, CARM1 | 0.0122419844677889 | |
| GO:0008584 | BP | GO:0008584 | male gonad development | SF1, GATA1 | 0.0124055775174619 | |
| GO:0046546 | BP | GO:0046546 | development of primary male sexual characteristics | SF1, GATA1 | 0.0125701361910893 | |
| GO:0010624 | BP | GO:0010624 | regulation of Schwann cell proliferation | RNF10 | 0.0129278616685888 | |
| GO:0014010 | BP | GO:0014010 | Schwann cell proliferation | RNF10 | 0.0129278616685888 | |
| GO:0034350 | BP | GO:0034350 | regulation of glial cell apoptotic process | CDK5 | 0.0129278616685888 | |
| GO:0042428 | BP | GO:0042428 | serotonin metabolic process | ALDH2 | 0.0129278616685888 | |
| GO:1902415 | BP | GO:1902415 | regulation of mRNA binding | CARM1 | 0.0129278616685888 | |
| GO:0050768 | BP | GO:0050768 | negative regulation of neurogenesis | CDK5, RNF10 | 0.0134073337992839 | |
| GO:0006352 | BP | GO:0006352 | DNA-templated transcription initiation | TAF9, E2F2 | 0.0139210936747692 | |
| GO:0000491 | BP | GO:0000491 | small nucleolar ribonucleoprotein complex assembly | TAF9 | 0.0140951780714967 | |
| GO:0006068 | BP | GO:0006068 | ethanol catabolic process | ALDH2 | 0.0140951780714967 | |
| GO:0016446 | BP | GO:0016446 | somatic hypermutation of immunoglobulin genes | POLL | 0.0140951780714967 | |
| GO:0033327 | BP | GO:0033327 | Leydig cell differentiation | SF1 | 0.0140951780714967 | |
| GO:0042416 | BP | GO:0042416 | dopamine biosynthetic process | ALDH2 | 0.0140951780714967 | |
| GO:0071372 | BP | GO:0071372 | cellular response to follicle-stimulating hormone stimulus | GATA1 | 0.0140951780714967 | |
| GO:0090084 | BP | GO:0090084 | negative regulation of inclusion body assembly | DNAJA4 | 0.0140951780714967 | |
| GO:0051961 | BP | GO:0051961 | negative regulation of nervous system development | CDK5, RNF10 | 0.0144433596501861 | |
| GO:2001236 | BP | GO:2001236 | regulation of extrinsic apoptotic signaling pathway | GATA1, CTTN | 0.0144433596501861 | |
| GO:0016241 | BP | GO:0016241 | regulation of macroautophagy | PIK3C3, CDK5 | 0.0149740707983485 | |
| GO:0002566 | BP | GO:0002566 | somatic diversification of immune receptors via somatic mutation | POLL | 0.0152611766782285 | |
| GO:0033690 | BP | GO:0033690 | positive regulation of osteoblast proliferation | GATA1 | 0.0152611766782285 | |
| GO:0035331 | BP | GO:0035331 | negative regulation of hippo signaling | MAP2K3 | 0.0152611766782285 | |
| GO:1902065 | BP | GO:1902065 | response to L-glutamate | TAF9 | 0.0152611766782285 | |
| GO:0006287 | BP | GO:0006287 | base-excision repair, gap-filling | POLL | 0.0164258589056936 | |
| GO:0021819 | BP | GO:0021819 | layer formation in cerebral cortex | CDK5 | 0.0164258589056936 | |
| GO:0030238 | BP | GO:0030238 | male sex determination | SF1 | 0.0164258589056936 | |
| GO:0042762 | BP | GO:0042762 | regulation of sulfur metabolic process | PDK4 | 0.0164258589056936 | |
| GO:0043201 | BP | GO:0043201 | response to leucine | PIK3C3 | 0.0164258589056936 | |
| GO:0045956 | BP | GO:0045956 | positive regulation of calcium ion-dependent exocytosis | CDK5 | 0.0164258589056936 | |
| GO:0046185 | BP | GO:0046185 | aldehyde catabolic process | ALDH2 | 0.0164258589056936 | |
| GO:0048148 | BP | GO:0048148 | behavioral response to cocaine | CDK5 | 0.0164258589056936 | |
| GO:0060009 | BP | GO:0060009 | Sertoli cell development | GATA1 | 0.0164258589056936 | |
| GO:1901160 | BP | GO:1901160 | primary amino compound metabolic process | ALDH2 | 0.0164258589056936 | |
| GO:1905214 | BP | GO:1905214 | regulation of RNA binding | CARM1 | 0.0164258589056936 | |
| GO:0046661 | BP | GO:0046661 | male sex differentiation | SF1, GATA1 | 0.0166162703615874 | |
| GO:0009267 | BP | GO:0009267 | cellular response to starvation | PIK3C3, PDK4 | 0.016991288020346 | |
| GO:0002262 | BP | GO:0002262 | myeloid cell homeostasis | KLF1, GATA1 | 0.0171801587263571 | |
| GO:1990138 | BP | GO:1990138 | neuron projection extension | CDK5, CTTN | 0.0173699344161231 | |
| GO:0072331 | BP | GO:0072331 | signal transduction by p53 class mediator | TAF9, E2F2 | 0.0175606128935438 | |
| GO:0033008 | BP | GO:0033008 | positive regulation of mast cell activation involved in immune response | GATA1 | 0.0175892261693535 | |
| GO:0034310 | BP | GO:0034310 | primary alcohol catabolic process | ALDH2 | 0.0175892261693535 | |
| GO:0043306 | BP | GO:0043306 | positive regulation of mast cell degranulation | GATA1 | 0.0175892261693535 | |
| GO:0098883 | BP | GO:0098883 | synapse pruning | CDK5 | 0.0175892261693535 | |
| GO:1902166 | BP | GO:1902166 | negative regulation of intrinsic apoptotic signaling pathway in response to DNA damage by p53 class mediator | TAF9 | 0.0175892261693535 | |
| GO:0016570 | BP | GO:0016570 | histone modification | CDK5, TAF9, CARM1 | 0.0177331530063361 | |
| GO:0022613 | BP | GO:0022613 | ribonucleoprotein complex biogenesis | RPS21, SF1, TAF9 | 0.0177331530063361 | |
| GO:0008361 | BP | GO:0008361 | regulation of cell size | CDK5, CTTN | 0.0185274704776959 | |
| GO:0007204 | BP | GO:0007204 | positive regulation of cytosolic calcium ion concentration | CDK5, GATA1 | 0.0187235197594105 | |
| GO:0030575 | BP | GO:0030575 | nuclear body organization | SF1 | 0.0187512798832239 | |
| GO:0034349 | BP | GO:0034349 | glial cell apoptotic process | CDK5 | 0.0187512798832239 | |
| GO:0034497 | BP | GO:0034497 | protein localization to phagophore assembly site | PIK3C3 | 0.0187512798832239 | |
| GO:0022411 | BP | GO:0022411 | cellular component disassembly | PIK3C3, CDK5, CTTN | 0.0190431310531555 | |
| GO:0043484 | BP | GO:0043484 | regulation of RNA splicing | SF1, TAF9 | 0.019316984014106 | |
| GO:0046890 | BP | GO:0046890 | regulation of lipid biosynthetic process | PDK4, SF1 | 0.019316984014106 | |
| GO:0000478 | BP | GO:0000478 | endonucleolytic cleavage involved in rRNA processing | RPS21 | 0.0199120214598757 | |
| GO:0000479 | BP | GO:0000479 | endonucleolytic cleavage of tricistronic rRNA transcript (SSU-rRNA, 5.8S rRNA, LSU-rRNA) | RPS21 | 0.0199120214598757 | |
| GO:0006085 | BP | GO:0006085 | acetyl-CoA biosynthetic process | PDK4 | 0.0199120214598757 | |
| GO:0018216 | BP | GO:0018216 | peptidyl-arginine methylation | CARM1 | 0.0199120214598757 | |
| GO:0060253 | BP | GO:0060253 | negative regulation of glial cell proliferation | RNF10 | 0.0199120214598757 | |
| GO:0099509 | BP | GO:0099509 | regulation of presynaptic cytosolic calcium ion concentration | CDK5 | 0.0199120214598757 | |
| GO:1902165 | BP | GO:1902165 | regulation of intrinsic apoptotic signaling pathway in response to DNA damage by p53 class mediator | TAF9 | 0.0199120214598757 | |
| GO:0099173 | BP | GO:0099173 | postsynapse organization | CDK5, CTTN | 0.0199183774621072 | |
| GO:0051495 | BP | GO:0051495 | positive regulation of cytoskeleton organization | CDK5, CTTN | 0.0209381624540443 | |
| GO:0032354 | BP | GO:0032354 | response to follicle-stimulating hormone | GATA1 | 0.0210714523104366 | |
| GO:0033033 | BP | GO:0033033 | negative regulation of myeloid cell apoptotic process | GATA1 | 0.0210714523104366 | |
| GO:0042402 | BP | GO:0042402 | cellular biogenic amine catabolic process | HNMT | 0.0210714523104366 | |
| GO:0051770 | BP | GO:0051770 | positive regulation of nitric-oxide synthase biosynthetic process | MAP2K3 | 0.0210714523104366 | |
| GO:0090083 | BP | GO:0090083 | regulation of inclusion body assembly | DNAJA4 | 0.0210714523104366 | |
| GO:0097067 | BP | GO:0097067 | cellular response to thyroid hormone stimulus | GATA1 | 0.0210714523104366 | |
| GO:1901387 | BP | GO:1901387 | positive regulation of voltage-gated calcium channel activity | CDK5 | 0.0210714523104366 | |
| GO:2000811 | BP | GO:2000811 | negative regulation of anoikis | PDK4 | 0.0210714523104366 | |
| GO:0017157 | BP | GO:0017157 | regulation of exocytosis | CDK5, GATA1 | 0.0217695527187595 | |
| GO:0031345 | BP | GO:0031345 | negative regulation of cell projection organization | CDK5, CARM1 | 0.0219795439747056 | |
| GO:0031643 | BP | GO:0031643 | positive regulation of myelination | RNF10 | 0.0222295738445929 | |
| GO:0043628 | BP | GO:0043628 | regulatory ncRNA 3'-end processing | RPS21 | 0.0222295738445929 | |
| GO:2000678 | BP | GO:2000678 | negative regulation of transcription regulatory region DNA binding | GATA1 | 0.0222295738445929 | |
| GO:0009310 | BP | GO:0009310 | amine catabolic process | HNMT | 0.0233863874705903 | |
| GO:0018195 | BP | GO:0018195 | peptidyl-arginine modification | CARM1 | 0.0233863874705903 | |
| GO:0042053 | BP | GO:0042053 | regulation of dopamine metabolic process | ALDH2 | 0.0233863874705903 | |
| GO:0042069 | BP | GO:0042069 | regulation of catecholamine metabolic process | ALDH2 | 0.0233863874705903 | |
| GO:0044794 | BP | GO:0044794 | positive regulation by host of viral process | PIK3C3 | 0.0233863874705903 | |
| GO:0060216 | BP | GO:0060216 | definitive hemopoiesis | GATA1 | 0.0233863874705903 | |
| GO:0071371 | BP | GO:0071371 | cellular response to gonadotropin stimulus | GATA1 | 0.0233863874705903 | |
| GO:2000251 | BP | GO:2000251 | positive regulation of actin cytoskeleton reorganization | CDK5 | 0.0233863874705903 | |
| GO:0006067 | BP | GO:0006067 | ethanol metabolic process | ALDH2 | 0.0245418945952348 | |
| GO:0009067 | BP | GO:0009067 | aspartate family amino acid biosynthetic process | PLOD2 | 0.0245418945952348 | |
| GO:0030502 | BP | GO:0030502 | negative regulation of bone mineralization | GATA1 | 0.0245418945952348 | |
| GO:0033005 | BP | GO:0033005 | positive regulation of mast cell activation | GATA1 | 0.0245418945952348 | |
| GO:0036092 | BP | GO:0036092 | phosphatidylinositol-3-phosphate biosynthetic process | PIK3C3 | 0.0245418945952348 | |
| GO:0060008 | BP | GO:0060008 | Sertoli cell differentiation | GATA1 | 0.0245418945952348 | |
| GO:0097062 | BP | GO:0097062 | dendritic spine maintenance | CTTN | 0.0245418945952348 | |
| GO:0042594 | BP | GO:0042594 | response to starvation | PIK3C3, PDK4 | 0.0245653897027808 | |
| GO:0001505 | BP | GO:0001505 | regulation of neurotransmitter levels | HNMT, CDK5 | 0.0254540156351499 | |
| GO:0007530 | BP | GO:0007530 | sex determination | SF1 | 0.025696096623896 | |
| GO:0009713 | BP | GO:0009713 | catechol-containing compound biosynthetic process | ALDH2 | 0.025696096623896 | |
| GO:0030220 | BP | GO:0030220 | platelet formation | GATA1 | 0.025696096623896 | |
| GO:0042026 | BP | GO:0042026 | protein refolding | DNAJA4 | 0.025696096623896 | |
| GO:0042423 | BP | GO:0042423 | catecholamine biosynthetic process | ALDH2 | 0.025696096623896 | |
| GO:0051767 | BP | GO:0051767 | nitric-oxide synthase biosynthetic process | MAP2K3 | 0.025696096623896 | |
| GO:0051769 | BP | GO:0051769 | regulation of nitric-oxide synthase biosynthetic process | MAP2K3 | 0.025696096623896 | |
| GO:0044827 | BP | GO:0044827 | modulation by host of viral genome replication | PIK3C3 | 0.0268489949605077 | |
| GO:0046823 | BP | GO:0046823 | negative regulation of nucleocytoplasmic transport | CDK5 | 0.0268489949605077 | |
| GO:0051457 | BP | GO:0051457 | maintenance of protein location in nucleus | CDK5 | 0.0268489949605077 | |
| GO:1902254 | BP | GO:1902254 | negative regulation of intrinsic apoptotic signaling pathway by p53 class mediator | TAF9 | 0.0268489949605077 | |
| GO:0006457 | BP | GO:0006457 | protein folding | FKBP5, DNAJA4 | 0.0275011843973804 | |
| GO:0008045 | BP | GO:0008045 | motor neuron axon guidance | CDK5 | 0.0280005910075667 | |
| GO:0035162 | BP | GO:0035162 | embryonic hemopoiesis | GATA1 | 0.0280005910075667 | |
| GO:0036344 | BP | GO:0036344 | platelet morphogenesis | GATA1 | 0.0280005910075667 | |
| GO:0042430 | BP | GO:0042430 | indole-containing compound metabolic process | ALDH2 | 0.0280005910075667 | |
| GO:0071222 | BP | GO:0071222 | cellular response to lipopolysaccharide | MAP2K3, GATA1 | 0.0284319626129196 | |
| GO:0097191 | BP | GO:0097191 | extrinsic apoptotic signaling pathway | GATA1, CTTN | 0.0291383832894666 | |
| GO:0000466 | BP | GO:0000466 | maturation of 5.8S rRNA from tricistronic rRNA transcript (SSU-rRNA, 5.8S rRNA, LSU-rRNA) | RPS21 | 0.0291508861661374 | |
| GO:0022038 | BP | GO:0022038 | corpus callosum development | CDK5 | 0.0291508861661374 | |
| GO:0043302 | BP | GO:0043302 | positive regulation of leukocyte degranulation | GATA1 | 0.0291508861661374 | |
| GO:0070841 | BP | GO:0070841 | inclusion body assembly | DNAJA4 | 0.0291508861661374 | |
| GO:2000209 | BP | GO:2000209 | regulation of anoikis | PDK4 | 0.0291508861661374 | |
| GO:0008406 | BP | GO:0008406 | gonad development | SF1, GATA1 | 0.0293754341027806 | |
| GO:0045055 | BP | GO:0045055 | regulated exocytosis | CDK5, GATA1 | 0.0293754341027806 | |
| GO:0031669 | BP | GO:0031669 | cellular response to nutrient levels | PIK3C3, PDK4 | 0.0298518895682596 | |
| GO:0022618 | BP | GO:0022618 | ribonucleoprotein complex assembly | SF1, TAF9 | 0.0300912902175587 | |
| GO:0048588 | BP | GO:0048588 | developmental cell growth | CDK5, CTTN | 0.0300912902175587 | |
| GO:0006929 | BP | GO:0006929 | substrate-dependent cell migration | CTTN | 0.0302998818358531 | |
| GO:0021697 | BP | GO:0021697 | cerebellar cortex formation | CDK5 | 0.0302998818358531 | |
| GO:0035330 | BP | GO:0035330 | regulation of hippo signaling | MAP2K3 | 0.0302998818358531 | |
| GO:1903421 | BP | GO:1903421 | regulation of synaptic vesicle recycling | CDK5 | 0.0302998818358531 | |
| GO:0010594 | BP | GO:0010594 | regulation of endothelial cell migration | MAP2K3, DNAJA4 | 0.0303314701480785 | |
| GO:0045137 | BP | GO:0045137 | development of primary sexual characteristics | SF1, GATA1 | 0.0305724273665167 | |
| GO:0016358 | BP | GO:0016358 | dendrite development | CDK5, CARM1 | 0.0308141598828155 | |
| GO:0060560 | BP | GO:0060560 | developmental growth involved in morphogenesis | CDK5, CTTN | 0.0308141598828155 | |
| GO:0001963 | BP | GO:0001963 | synaptic transmission, dopaminergic | CDK5 | 0.0314475794149154 | |
| GO:0018126 | BP | GO:0018126 | protein hydroxylation | PLOD2 | 0.0314475794149154 | |
| GO:0021801 | BP | GO:0021801 | cerebral cortex radial glia-guided migration | CDK5 | 0.0314475794149154 | |
| GO:0022030 | BP | GO:0022030 | telencephalon glial cell migration | CDK5 | 0.0314475794149154 | |
| GO:0042133 | BP | GO:0042133 | neurotransmitter metabolic process | HNMT | 0.0314475794149154 | |
| GO:0042501 | BP | GO:0042501 | serine phosphorylation of STAT protein | CDK5 | 0.0314475794149154 | |
| GO:0071219 | BP | GO:0071219 | cellular response to molecule of bacterial origin | MAP2K3, GATA1 | 0.0315439893668721 | |
| GO:0007160 | BP | GO:0007160 | cell-matrix adhesion | CDK5, CTTN | 0.0320343825067573 | |
| GO:0071826 | BP | GO:0071826 | ribonucleoprotein complex subunit organization | SF1, TAF9 | 0.0320343825067573 | |
| GO:0032801 | BP | GO:0032801 | receptor catabolic process | CDK5 | 0.0325939803000967 | |
| GO:0042398 | BP | GO:0042398 | cellular modified amino acid biosynthetic process | PLOD2 | 0.0325939803000967 | |
| GO:0090314 | BP | GO:0090314 | positive regulation of protein targeting to membrane | CDK5 | 0.0325939803000967 | |
| GO:0150146 | BP | GO:0150146 | cell junction disassembly | CDK5 | 0.0325939803000967 | |
| GO:1903671 | BP | GO:1903671 | negative regulation of sprouting angiogenesis | E2F2 | 0.0325939803000967 | |
| GO:0000469 | BP | GO:0000469 | cleavage involved in rRNA processing | RPS21 | 0.0337390858867429 | |
| GO:0034698 | BP | GO:0034698 | response to gonadotropin | GATA1 | 0.0348828975687708 | |
| GO:0035521 | BP | GO:0035521 | monoubiquitinated histone deubiquitination | TAF9 | 0.0348828975687708 | |
| GO:0035522 | BP | GO:0035522 | monoubiquitinated histone H2A deubiquitination | TAF9 | 0.0348828975687708 | |
| GO:0070168 | BP | GO:0070168 | negative regulation of biomineral tissue development | GATA1 | 0.0348828975687708 | |
| GO:0097066 | BP | GO:0097066 | response to thyroid hormone | GATA1 | 0.0348828975687708 | |
| GO:1902230 | BP | GO:1902230 | negative regulation of intrinsic apoptotic signaling pathway in response to DNA damage | TAF9 | 0.0348828975687708 | |
| GO:0000082 | BP | GO:0000082 | G1/S transition of mitotic cell cycle | CDK5, E2F2 | 0.0350403204978028 | |
| GO:0014044 | BP | GO:0014044 | Schwann cell development | CDK5 | 0.0360254167386744 | |
| GO:0033688 | BP | GO:0033688 | regulation of osteoblast proliferation | GATA1 | 0.0360254167386744 | |
| GO:0043304 | BP | GO:0043304 | regulation of mast cell degranulation | GATA1 | 0.0360254167386744 | |
| GO:0045987 | BP | GO:0045987 | positive regulation of smooth muscle contraction | CTTN | 0.0360254167386744 | |
| GO:0048873 | BP | GO:0048873 | homeostasis of number of cells within a tissue | GATA1 | 0.0360254167386744 | |
| GO:0006084 | BP | GO:0006084 | acetyl-CoA metabolic process | PDK4 | 0.0371666447875227 | |
| GO:0006622 | BP | GO:0006622 | protein targeting to lysosome | PIK3C3 | 0.0371666447875227 | |
| GO:0033032 | BP | GO:0033032 | regulation of myeloid cell apoptotic process | GATA1 | 0.0371666447875227 | |
| GO:0046825 | BP | GO:0046825 | regulation of protein export from nucleus | CDK5 | 0.0371666447875227 | |
| GO:0031668 | BP | GO:0031668 | cellular response to extracellular stimulus | PIK3C3, PDK4 | 0.037626816923289 | |
| GO:0001894 | BP | GO:0001894 | tissue homeostasis | PDK4, GATA1 | 0.0381528277608624 | |
| GO:0060249 | BP | GO:0060249 | anatomical structure homeostasis | PDK4, GATA1 | 0.0381528277608624 | |
| GO:0033006 | BP | GO:0033006 | regulation of mast cell activation involved in immune response | GATA1 | 0.0383065831049632 | |
| GO:0071216 | BP | GO:0071216 | cellular response to biotic stimulus | MAP2K3, GATA1 | 0.0384169097521931 | |
| GO:0033238 | BP | GO:0033238 | regulation of amine metabolic process | ALDH2 | 0.0394452330792213 | |
| GO:0045648 | BP | GO:0045648 | positive regulation of erythrocyte differentiation | GATA1 | 0.0394452330792213 | |
| GO:0090313 | BP | GO:0090313 | regulation of protein targeting to membrane | CDK5 | 0.0394452330792213 | |
| GO:1901797 | BP | GO:1901797 | negative regulation of signal transduction by p53 class mediator | TAF9 | 0.0394452330792213 | |
| GO:0033146 | BP | GO:0033146 | regulation of intracellular estrogen receptor signaling pathway | CARM1 | 0.0405825960971037 | |
| GO:0043276 | BP | GO:0043276 | anoikis | PDK4 | 0.0405825960971037 | |
| GO:0045943 | BP | GO:0045943 | positive regulation of transcription by RNA polymerase I | CARM1 | 0.0405825960971037 | |
| GO:0071398 | BP | GO:0071398 | cellular response to fatty acid | PDK4 | 0.0405825960971037 | |
| GO:1901099 | BP | GO:1901099 | negative regulation of signal transduction in absence of ligand | GATA1 | 0.0405825960971037 | |
| GO:1902253 | BP | GO:1902253 | regulation of intrinsic apoptotic signaling pathway by p53 class mediator | TAF9 | 0.0405825960971037 | |
| GO:2001240 | BP | GO:2001240 | negative regulation of extrinsic apoptotic signaling pathway in absence of ligand | GATA1 | 0.0405825960971037 | |
| GO:0000460 | BP | GO:0000460 | maturation of 5.8S rRNA | RPS21 | 0.0417186735439989 | |
| GO:0021696 | BP | GO:0021696 | cerebellar cortex morphogenesis | CDK5 | 0.0417186735439989 | |
| GO:0021799 | BP | GO:0021799 | cerebral cortex radially oriented cell migration | CDK5 | 0.0417186735439989 | |
| GO:0033687 | BP | GO:0033687 | osteoblast proliferation | GATA1 | 0.0417186735439989 | |
| GO:0035520 | BP | GO:0035520 | monoubiquitinated protein deubiquitination | TAF9 | 0.0417186735439989 | |
| GO:0046320 | BP | GO:0046320 | regulation of fatty acid oxidation | PDK4 | 0.0417186735439989 | |
| GO:0006260 | BP | GO:0006260 | DNA replication | POLL, CARM1 | 0.0421882977326854 | |
| GO:0014037 | BP | GO:0014037 | Schwann cell differentiation | CDK5 | 0.0428534668038772 | |
| GO:0031646 | BP | GO:0031646 | positive regulation of nervous system process | RNF10 | 0.0428534668038772 | |
| GO:1903146 | BP | GO:1903146 | regulation of autophagy of mitochondrion | CTTN | 0.0428534668038772 | |
| GO:0044843 | BP | GO:0044843 | cell cycle G1/S phase transition | CDK5, E2F2 | 0.0430141964056161 | |
| GO:0007548 | BP | GO:0007548 | sex differentiation | SF1, GATA1 | 0.0435682161249799 | |
| GO:0043542 | BP | GO:0043542 | endothelial cell migration | MAP2K3, DNAJA4 | 0.0435682161249799 | |
| GO:0000462 | BP | GO:0000462 | maturation of SSU-rRNA from tricistronic rRNA transcript (SSU-rRNA, 5.8S rRNA, LSU-rRNA) | RPS21 | 0.0439869772592966 | |
| GO:0030808 | BP | GO:0030808 | regulation of nucleotide biosynthetic process | PDK4 | 0.0439869772592966 | |
| GO:0032435 | BP | GO:0032435 | negative regulation of proteasomal ubiquitin-dependent protein catabolic process | TAF9 | 0.0439869772592966 | |
| GO:0033028 | BP | GO:0033028 | myeloid cell apoptotic process | GATA1 | 0.0439869772592966 | |
| GO:1900371 | BP | GO:1900371 | regulation of purine nucleotide biosynthetic process | PDK4 | 0.0439869772592966 | |
| GO:1902229 | BP | GO:1902229 | regulation of intrinsic apoptotic signaling pathway in response to DNA damage | TAF9 | 0.0439869772592966 | |
| GO:0010721 | BP | GO:0010721 | negative regulation of cell development | CDK5, RNF10 | 0.0444043399145283 | |
| GO:0017158 | BP | GO:0017158 | regulation of calcium ion-dependent exocytosis | CDK5 | 0.0451192062913968 | |
| GO:0030279 | BP | GO:0030279 | negative regulation of ossification | GATA1 | 0.0451192062913968 | |
| GO:0030851 | BP | GO:0030851 | granulocyte differentiation | GATA1 | 0.0451192062913968 | |
| GO:0042401 | BP | GO:0042401 | biogenic amine biosynthetic process | ALDH2 | 0.0451192062913968 | |
| GO:0048821 | BP | GO:0048821 | erythrocyte development | GATA1 | 0.0451192062913968 | |
| GO:0060251 | BP | GO:0060251 | regulation of glial cell proliferation | RNF10 | 0.0451192062913968 | |
| GO:0098926 | BP | GO:0098926 | postsynaptic signal transduction | RNF10 | 0.0451192062913968 | |
| GO:1903532 | BP | GO:1903532 | positive regulation of secretion by cell | CDK5, GATA1 | 0.0452465329217934 | |
| GO:0006520 | BP | GO:0006520 | amino acid metabolic process | HNMT, PLOD2 | 0.0455286041475041 | |
| GO:0009309 | BP | GO:0009309 | amine biosynthetic process | ALDH2 | 0.0462501552799078 | |
| GO:0030866 | BP | GO:0030866 | cortical actin cytoskeleton organization | CDK5 | 0.0462501552799078 | |
| GO:0048489 | BP | GO:0048489 | synaptic vesicle transport | CDK5 | 0.0462501552799078 | |
| GO:0010632 | BP | GO:0010632 | regulation of epithelial cell migration | MAP2K3, DNAJA4 | 0.0469489304718255 | |
| GO:0042417 | BP | GO:0042417 | dopamine metabolic process | ALDH2 | 0.0473798256031469 | |
| GO:0072595 | BP | GO:0072595 | maintenance of protein localization in organelle | CDK5 | 0.0473798256031469 | |
| GO:0045124 | BP | GO:0045124 | regulation of bone resorption | PDK4 | 0.0485082186380215 | |
| GO:0048608 | BP | GO:0048608 | reproductive structure development | SF1, GATA1 | 0.0486750189680857 | |
| GO:0097193 | BP | GO:0097193 | intrinsic apoptotic signaling pathway | TAF9, E2F2 | 0.0486750189680857 | |
| GO:0048872 | BP | GO:0048872 | homeostasis of number of cells | KLF1, GATA1 | 0.0495468265635976 | |
| GO:0006284 | BP | GO:0006284 | base-excision repair | POLL | 0.0496353357600315 | |
| GO:0061001 | BP | GO:0061001 | regulation of dendritic spine morphogenesis | CDK5 | 0.0496353357600315 | |
| GO:0061458 | BP | GO:0061458 | reproductive system development | SF1, GATA1 | 0.0498387155215432 | |
| GO:0022627 | CC | GO:0022627 | cytosolic small ribosomal subunit | RPS4Y2, RPS21 | 0.000968371994930696 | |
| GO:0005840 | CC | GO:0005840 | ribosome | RPS4Y2, RPS21, SF1 | 0.00208186450461716 | |
| GO:0090575 | CC | GO:0090575 | RNA polymerase II transcription regulator complex | TAF9, E2F2, E2F5 | 0.00279317358832216 | |
| GO:0015935 | CC | GO:0015935 | small ribosomal subunit | RPS4Y2, RPS21 | 0.00311877389194335 | |
| GO:0005791 | CC | GO:0005791 | rough endoplasmic reticulum | RPS21, PLOD2 | 0.00381383841215186 | |
| GO:0061695 | CC | GO:0061695 | transferase complex, transferring phosphorus-containing groups | PIK3C3, CDK5, TAF9 | 0.00471179155101867 | |
| GO:0022626 | CC | GO:0022626 | cytosolic ribosome | RPS4Y2, RPS21 | 0.00561537495566374 | |
| GO:0001650 | CC | GO:0001650 | fibrillar center | EEF1D, E2F5 | 0.0116383373781445 | |
| GO:0044754 | CC | GO:0044754 | autolysosome | PIK3C3 | 0.0134462032467962 | |
| GO:0099243 | CC | GO:0099243 | extrinsic component of synaptic membrane | RNF10 | 0.0134462032467962 | |
| GO:0030426 | CC | GO:0030426 | growth cone | CDK5, CTTN | 0.0150247954278766 | |
| GO:1990023 | CC | GO:1990023 | mitotic spindle midzone | CTTN | 0.0156703906410728 | |
| GO:0030427 | CC | GO:0030427 | site of polarized growth | CDK5, CTTN | 0.0158868089579062 | |
| GO:0044391 | CC | GO:0044391 | ribosomal subunit | RPS4Y2, RPS21 | 0.0182253772536466 | |
| GO:0005767 | CC | GO:0005767 | secondary lysosome | PIK3C3 | 0.0201044142534483 | |
| GO:0033276 | CC | GO:0033276 | transcription factor TFTC complex | TAF9 | 0.0201044142534483 | |
| GO:0030027 | CC | GO:0030027 | lamellipodium | CDK5, CTTN | 0.0214899891786171 | |
| GO:0030867 | CC | GO:0030867 | rough endoplasmic reticulum membrane | PLOD2 | 0.0267197186428842 | |
| GO:0000124 | CC | GO:0000124 | SAGA complex | TAF9 | 0.0278181164160378 | |
| GO:0005942 | CC | GO:0005942 | phosphatidylinositol 3-kinase complex | PIK3C3 | 0.0321998864973859 | |
| GO:0002102 | CC | GO:0002102 | podosome | CTTN | 0.0332923798268052 | |
| GO:0042788 | CC | GO:0042788 | polysomal ribosome | RPS21 | 0.0343836959004815 | |
| GO:0071339 | CC | GO:0071339 | MLL1 complex | TAF9 | 0.0343836959004815 | |
| GO:0044665 | CC | GO:0044665 | MLL1/2 complex | TAF9 | 0.0354738359266628 | |
| GO:0150034 | CC | GO:0150034 | distal axon | CDK5, CTTN | 0.0384662974029231 | |
| GO:0043596 | CC | GO:0043596 | nuclear replication fork | CARM1 | 0.0387372117850396 | |
| GO:0051233 | CC | GO:0051233 | spindle midzone | CTTN | 0.039822659680165 | |
| GO:0000407 | CC | GO:0000407 | phagophore assembly site | PIK3C3 | 0.0409069375513819 | |
| GO:0019898 | CC | GO:0019898 | extrinsic component of membrane | PIK3C3, RNF10 | 0.0412807077541116 | |
| GO:0070461 | CC | GO:0070461 | SAGA-type complex | TAF9 | 0.043071988025695 | |
| GO:0005669 | CC | GO:0005669 | transcription factor TFIID complex | TAF9 | 0.0495391835580108 | |
| GO:0002039 | MF | GO:0002039 | p53 binding | CDK5, TAF9, GATA1 | 7.79584287075347e-05 | |
| GO:0070742 | MF | GO:0070742 | C2H2 zinc finger domain binding | TAF9, GATA1 | 0.000155915303685965 | |
| GO:0031072 | MF | GO:0031072 | heat shock protein binding | CDK5, FKBP5, DNAJA4 | 0.00052855931132198 | |
| GO:0008170 | MF | GO:0008170 | N-methyltransferase activity | HNMT, CARM1 | 0.00675767526457086 | |
| GO:0005522 | MF | GO:0005522 | profilin binding | CTTN | 0.0124538143898584 | |
| GO:0005528 | MF | GO:0005528 | FK506 binding | FKBP5 | 0.0124538143898584 | |
| GO:0016303 | MF | GO:0016303 | 1-phosphatidylinositol-3-kinase activity | PIK3C3 | 0.0124538143898584 | |
| GO:0016661 | MF | GO:0016661 | oxidoreductase activity, acting on other nitrogenous compounds as donors | ALDH2 | 0.0136910039028511 | |
| GO:0005527 | MF | GO:0005527 | macrolide binding | FKBP5 | 0.0149267107832425 | |
| GO:0016273 | MF | GO:0016273 | arginine N-methyltransferase activity | CARM1 | 0.0149267107832425 | |
| GO:0016274 | MF | GO:0016274 | protein-arginine N-methyltransferase activity | CARM1 | 0.0149267107832425 | |
| GO:0035004 | MF | GO:0035004 | phosphatidylinositol 3-kinase activity | PIK3C3 | 0.0149267107832425 | |
| GO:0008757 | MF | GO:0008757 | S-adenosylmethionine-dependent methyltransferase activity | HNMT, CARM1 | 0.0173206668512796 | |
| GO:0004029 | MF | GO:0004029 | aldehyde dehydrogenase (NAD+) activity | ALDH2 | 0.018624952580563 | |
| GO:0030548 | MF | GO:0030548 | acetylcholine receptor regulator activity | CDK5 | 0.0198547458730682 | |
| GO:0099602 | MF | GO:0099602 | neurotransmitter receptor regulator activity | CDK5 | 0.0198547458730682 | |
| GO:0001216 | MF | GO:0001216 | DNA-binding transcription activator activity | GATA1, E2F2, E2F5 | 0.0203802706747054 | |
| GO:0003735 | MF | GO:0003735 | structural constituent of ribosome | RPS4Y2, RPS21 | 0.0204545316918173 | |
| GO:0140297 | MF | GO:0140297 | DNA-binding transcription factor binding | TAF9, GATA1, CARM1 | 0.0210663237211589 | |
| GO:0004030 | MF | GO:0004030 | aldehyde dehydrogenase [NAD(P)+] activity | ALDH2 | 0.021083064995006 | |
| GO:0052742 | MF | GO:0052742 | phosphatidylinositol kinase activity | PIK3C3 | 0.021083064995006 | |
| GO:0004708 | MF | GO:0004708 | MAP kinase kinase activity | MAP2K3 | 0.0223099116332532 | |
| GO:0003746 | MF | GO:0003746 | translation elongation factor activity | EEF1D | 0.0235352874728497 | |
| GO:0031418 | MF | GO:0031418 | L-ascorbic acid binding | PLOD2 | 0.0247591941969981 | |
| GO:0035173 | MF | GO:0035173 | histone kinase activity | CDK5 | 0.0259816334870668 | |
| GO:0050321 | MF | GO:0050321 | tau-protein kinase activity | CDK5 | 0.027202607022591 | |
| GO:0008168 | MF | GO:0008168 | methyltransferase activity | HNMT, CARM1 | 0.027617426312491 | |
| GO:0070577 | MF | GO:0070577 | lysine-acetylated histone binding | CARM1 | 0.0284221164812752 | |
| GO:0140033 | MF | GO:0140033 | acetylation-dependent protein binding | CARM1 | 0.0284221164812752 | |
| GO:0003887 | MF | GO:0003887 | DNA-directed DNA polymerase activity | POLL | 0.0296401635389952 | |
| GO:0016741 | MF | GO:0016741 | transferase activity, transferring one-carbon groups | HNMT, CARM1 | 0.0308824711866325 | |
| GO:0046875 | MF | GO:0046875 | ephrin receptor binding | CDK5 | 0.035708521340988 | |
| GO:0004693 | MF | GO:0004693 | cyclin-dependent protein serine/threonine kinase activity | CDK5 | 0.0369178290841261 | |
| GO:0097472 | MF | GO:0097472 | cyclin-dependent protein kinase activity | CDK5 | 0.0369178290841261 | |
| GO:0034061 | MF | GO:0034061 | DNA polymerase activity | POLL | 0.0441432684868652 | |
| GO:0003755 | MF | GO:0003755 | peptidyl-prolyl cis-trans isomerase activity | FKBP5 | 0.0465402043994277 | |
| GO:0016620 | MF | GO:0016620 | oxidoreductase activity, acting on the aldehyde or oxo group of donors, NAD or NADP as acceptor | ALDH2 | 0.0477365153098424 | |
| GO:0003713 | MF | GO:0003713 | transcription coactivator activity | TAF9, CARM1 | 0.0480778244496927 | |
| GO:0016251 | MF | GO:0016251 | RNA polymerase II general transcription initiation factor activity | TAF9 | 0.0489313903861039 | |
| GO:0140938 | MF | GO:0140938 | histone H3 methyltransferase activity | CARM1 | 0.0489313903861039 | |

**Supplementary Table 5 KEGG** **enrichment results.**

|  | category | subcategory | ID | Description | GeneRatio | BgRatio | pvalue | p.adjust | qvalue | geneID | Count |
| --- | --- | --- | --- | --- | --- | --- | --- | --- | --- | --- | --- |
| hsa00340 | Metabolism | Amino acid metabolism | hsa00340 | Histidine metabolism | 16-Feb | 22/8535 | 0.000744673265852745 | 0.0580845147365141 | 0.0533029285031439 | 3176/217 | 2 |
| hsa04218 | Cellular Processes | Cell growth and death | hsa04218 | Cellular senescence | 16-Mar | 157/8535 | 0.0028676241768899 | 0.111837342898706 | 0.102630760015007 | 5606/1870/1875 | 3 |
| hsa00310 | Metabolism | Amino acid metabolism | hsa00310 | Lysine degradation | 16-Feb | 63/8535 | 0.00602016824458452 | 0.156524374359197 | 0.143639101976052 | 217/5352 | 2 |

**Supplementary Table 6 Correlation between biomarkers and seven types of immune cells.**

| HNMT | Cor | Pvalue | Cell |
| --- | --- | --- | --- |
|  | -0.21600062 | 0.164177296592017 | B.cells |
|  | 0.268996061104349 | 0.0811141240045309 | CD8..naive.T.cells |
|  | 0.579825436349464 | 4.60548333464353e-05 | cDC |
|  | -0.193776163 | 0.213104654451707 | Class.switched.memory.B.cells |
|  | -0.121244502 | 0.438641585582574 | Memory.B.cells |
|  | -0.241903266 | 0.118091302550128 | naive.B.cells |
|  | 0.493895533360592 | 0.000763088793790055 | pDC |

| ALDH2 | Cor | Pvalue | Cell |
| --- | --- | --- | --- |
|  | -0.511876384 | 0.000450514111885861 | B.cells |
|  | 0.295631159957654 | 0.0542638032949233 | CD8..naive.T.cells |
|  | 0.520013231757631 | 0.000351497716062863 | cDC |
|  | -0.410881511 | 0.00620087740742677 | Class.switched.memory.B.cells |
|  | -0.423282166 | 0.00468183691182325 | Memory.B.cells |
|  | -0.514235097 | 0.00041950846695001 | naive.B.cells |
|  | 0.278252485752342 | 0.0708052938176298 | pDC |

**Supplementary Table 7 GSEA enrichment results.**

|  | ID | Description | setSize | enrichmentScore | NES | pvalue | p.adjust | qvalue | rank | leading_edge | core_enrichment |
| --- | --- | --- | --- | --- | --- | --- | --- | --- | --- | --- | --- |
| KEGG_STARCH_AND_SUCROSE_METABOLISM | KEGG_STARCH_AND_SUCROSE_METABOLISM | KEGG_STARCH_AND_SUCROSE_METABOLISM | 39 | 0.561763122947461 | 2.01728628641549 | 3.94858043345058e-05 | 0.005948498059313 | 0.00417438460302667 | 3098 | tags=69%, list=29%, signal=49% | UQCRC1/PLCB1/MAP2K1/PPP1CC/KRAS/UBE3C/PAPOLA/ATP1B3/GSTP1/CTNNA1/ATP6V1B2/STAG1/COX5A/POLR2A/INPP1/CASP3/YWHAG/CAMK2G/MAP3K2/MAPK1/HSPA1B/UPP1/IDH3A/BMPR2/SMUG1/ARPC5/HLA-DRB3 |
| KEGG_TIGHT_JUNCTION | KEGG_TIGHT_JUNCTION | KEGG_TIGHT_JUNCTION | 40 | 0.555894633847151 | 2.00614288145382 | 6.39623447237957e-05 | 0.005948498059313 | 0.00417438460302667 | 2544 | tags=57%, list=24%, signal=44% | NME6/TICAM2/ITGAM/MAP2K1/ARPC1A/NDUFB3/KRAS/ATP6V1A/ATG7/ALDH1A1/ANAPC11/RFC1/POLR3B/COX6A1/F2RL1/GRB2/NRAS/RAF1/PCCA/RARA/NFKBIA/NDUFA8/MKNK2 |
| KEGG_HUNTINGTONS_DISEASE | KEGG_HUNTINGTONS_DISEASE | KEGG_HUNTINGTONS_DISEASE | 40 | 0.541962258570055 | 1.95586296547325 | 0.000122542135415035 | 0.00759761239573215 | 0.00533165782156642 | 3980 | tags=80%, list=37%, signal=51% | ALDOA/RPS6KA1/PAK2/ACTB/RFC1/PTPN6/CLTC/CSF1R/HLA-DMB/VASP/TNFRSF1A/SSBP1/GPI/GRB2/CAMK2G/CBR3/CCNH/MAP3K7/RALA/NNT/CRK/PIK3CD/STAM/HLA-G/PDE6D/PRKAA1/GSK3B/PTK2B/ACAT1/ZYX/PDPK1/CDK4 |
| KEGG_VALINE_LEUCINE_AND_ISOLEUCINE_DEGRADATION | KEGG_VALINE_LEUCINE_AND_ISOLEUCINE_DEGRADATION | KEGG_VALINE_LEUCINE_AND_ISOLEUCINE_DEGRADATION | 42 | 0.527309102281569 | 1.93248176589417 | 0.000311417653091088 | 0.0144809208687356 | 0.010162049732446 | 2491 | tags=43%, list=23%, signal=33% | SUMF1/PPP1CC/SORT1/ACTB/PLD1/UBE2E2/XRN2/GNAI3/ITGB1/TNFRSF1A/COX7B/MYD88/SPHK2/PIK3CB/TGFBR2/GLCE/NFKBIA/HAL |
| KEGG_AMINO_SUGAR_AND_NUCLEOTIDE_SUGAR_METABOLISM | KEGG_AMINO_SUGAR_AND_NUCLEOTIDE_SUGAR_METABOLISM | KEGG_AMINO_SUGAR_AND_NUCLEOTIDE_SUGAR_METABOLISM | 39 | 0.510931663407403 | 1.83475097560579 | 0.000509884920198621 | 0.0189677190313887 | 0.0133106800220272 | 2928 | tags=54%, list=27%, signal=39% | ALDH2/EIF4E2/PLCB1/PPP1CA/NDUFB3/PTPN11/CD14/NOTCH2/CDK5R1/DDX6/CLN3/UBE2J1/GRB2/XRCC1/NRAS/RAF1/GNB4/NFKBIA/CBL/HLA-G/EP300 |
| KEGG_HEDGEHOG_SIGNALING_PATHWAY | KEGG_HEDGEHOG_SIGNALING_PATHWAY | KEGG_HEDGEHOG_SIGNALING_PATHWAY | 36 | 0.521595462848912 | 1.84563730249544 | 0.000695297820062365 | 0.0215542324219333 | 0.0151257771381988 | 3764 | tags=69%, list=35%, signal=45% | RAC1/PLD1/GSTK1/PRKDC/MAPK9/CD36/PIK3CG/HLA-DMA/PTEN/PSMD7/PCNA/AKT1/MAPK1/ALDH9A1/NFKBIA/FGR/IFNGR2/EP300/ROCK1/DTYMK/POLR3H/F11R/TNF/RB1/GOT2 |
| KEGG_STEROID_HORMONE_BIOSYNTHESIS | KEGG_STEROID_HORMONE_BIOSYNTHESIS | KEGG_STEROID_HORMONE_BIOSYNTHESIS | 35 | 0.521101098710051 | 1.83157510921227 | 0.00116762384076814 | 0.0310254334832678 | 0.0217722340233458 | 2741 | tags=57%, list=25%, signal=43% | MGAT1/COX8A/MAP3K1/PPP2R1A/CD86/CALM2/HSPA1A/MSH6/RASSF5/CTNNBL1/ITGB1/GRK6/GRB2/MAPK3/COX7B/AKT1/EXT2/ALDH9A1/PIK3CD/PPP1R12A |
| KEGG_PROTEIN_EXPORT | KEGG_PROTEIN_EXPORT | KEGG_PROTEIN_EXPORT | 37 | 0.503573056955381 | 1.79802294047289 | 0.00138445430267398 | 0.0321235276067864 | 0.0225428263907273 | 3561 | tags=59%, list=33%, signal=40% | SDHB/DCP2/FBP1/MAP2K1/HADHA/KRAS/ATP1B3/RAC2/ACTG1/PIK3CA/CCND2/RAF1/MYH4/SNRPB/HDAC2/NDUFS8/EP300/FEN1/GPD2/POLR2J2/POLE3/PRKCA |
| KEGG_HOMOLOGOUS_RECOMBINATION | KEGG_HOMOLOGOUS_RECOMBINATION | KEGG_HOMOLOGOUS_RECOMBINATION | 35 | 0.509822239311242 | 1.79193198010296 | 0.00189977851437984 | 0.0321235276067864 | 0.0225428263907273 | 2159 | tags=49%, list=20%, signal=39% | RPS6KA1/CHUK/ATP6V0D1/PAK2/PRKDC/MAPK9/RIPK1/HLA-DMA/SEMA4A/CASP3/PIK3CA/RAF1/ITPKB/DCPS/NDUFB6/NCK1/PIK3CB |
| KEGG_CARDIAC_MUSCLE_CONTRACTION | KEGG_CARDIAC_MUSCLE_CONTRACTION | KEGG_CARDIAC_MUSCLE_CONTRACTION | 34 | 0.509281713446286 | 1.77067455930411 | 0.0016421035062777 | 0.0321235276067864 | 0.0225428263907273 | 2177 | tags=53%, list=20%, signal=42% | IL13RA1/NEU1/MAP2K1/HADHA/CHUK/RHOA/KRAS/CD14/ACOX3/MGRN1/CDC42/STAT3/RPL13A/ACOX1/AKR1A1/ACACA/FES/MAPK1 |
| KEGG_ERBB_SIGNALING_PATHWAY | KEGG_ERBB_SIGNALING_PATHWAY | KEGG_ERBB_SIGNALING_PATHWAY | 36 | 0.498503229861391 | 1.76392668644273 | 0.00179319502883758 | 0.0321235276067864 | 0.0225428263907273 | 2736 | tags=53%, list=25%, signal=39% | ALDH2/RAC1/LTBR/TLR5/STX12/ZBTB16/IRAK4/F12/PIK3CA/NDUFV2/COMT/INPP5D/H6PD/SNW1/NDUFB7/PIK3CB/TGFBR2/PIK3CD/ITPK1 |
| KEGG_NUCLEOTIDE_EXCISION_REPAIR | KEGG_NUCLEOTIDE_EXCISION_REPAIR | KEGG_NUCLEOTIDE_EXCISION_REPAIR | 39 | 0.483600964098691 | 1.73660668193209 | 0.00218306832865604 | 0.0338375590941686 | 0.0237456555046797 | 3049 | tags=54%, list=28%, signal=39% | GLB1/NME6/FZD2/NUMB/MAP2K1/FADD/VPS37A/MYH9/IRAK4/HLA-DMA/CASP3/YWHAG/NDUFS1/ELK1/ARRB1/ACOX1/RAD50/NDUFS8/VHL/SOD1/WAS |
| KEGG_GLYCOSAMINOGLYCAN_BIOSYNTHESIS_HEPARAN_SULFATE | KEGG_GLYCOSAMINOGLYCAN_BIOSYNTHESIS_HEPARAN_SULFATE | KEGG_GLYCOSAMINOGLYCAN_BIOSYNTHESIS_HEPARAN_SULFATE | 38 | 0.489286449466584 | 1.75171199007592 | 0.00315247071319087 | 0.0418828251895358 | 0.0293914562733585 | 3248 | tags=53%, list=30%, signal=37% | CYBA/IDH1/FBP1/SLC25A5/DAG1/COX6A1/ATP6V1C1/GSTZ1/SULT1A2/RAF1/PIK3CB/OPRL1/POLR2C/STAG2/NDUFB2/SNRPB/MTFMT/ARPC1B/HMGB1/ACP2 |
| KEGG_RIG_I_LIKE_RECEPTOR_SIGNALING_PATHWAY | KEGG_RIG_I_LIKE_RECEPTOR_SIGNALING_PATHWAY | KEGG_RIG_I_LIKE_RECEPTOR_SIGNALING_PATHWAY | 33 | 0.495989133060774 | 1.71137326288965 | 0.00311583318348973 | 0.0418828251895358 | 0.0293914562733585 | 2177 | tags=42%, list=20%, signal=34% | UQCRC1/MAP2K1/POLR2B/RXRA/ATP1A1/ACTG1/PIK3CG/ITGB1/IFNA10/PIK3CA/SYK/NDUFAB1/PIK3CB/MAPK1 |
| KEGG_ARRHYTHMOGENIC_RIGHT_VENTRICULAR_CARDIOMYOPATHY_ARVC | KEGG_ARRHYTHMOGENIC_RIGHT_VENTRICULAR_CARDIOMYOPATHY_ARVC | KEGG_ARRHYTHMOGENIC_RIGHT_VENTRICULAR_CARDIOMYOPATHY_ARVC | 28 | 0.515457514331075 | 1.714516 | 0.00372407020608525 | 0.046047917957492 | 0.0323143283912225 | 2033 | tags=46%, list=19%, signal=38% | IL6R/ITGAM/SLC25A5/ATP6V0D1/RHOA/KRAS/EIF4B/CDA/MMP9/CDC42/MAPK3/RAF1/ALG6 |
| KEGG_OLFACTORY_TRANSDUCTION | KEGG_OLFACTORY_TRANSDUCTION | KEGG_OLFACTORY_TRANSDUCTION | 43 | 0.462535744642678 | 1.69426078609977 | 0.00396111122214985 | 0.046047917957492 | 0.0323143283912225 | 2432 | tags=49%, list=23%, signal=38% | TPI1/MAP2K1/PPP2R1A/PSMB7/BCAT1/DAG1/MIF/P2RX7/PIK3CA/FAS/NME2/PCNA/GSTZ1/MAPK3/ITGA5/MYD88/PIK3CB/AGL/NFKBIA/ARSG/AKR1B1 |

**Supplementary Table 8 HNMT enrichment results.**

|  | ID | Description | setSize | enrichmentScore | NES | pvalue | p.adjust | qvalue | rank | leading_edge | core_enrichment |
| --- | --- | --- | --- | --- | --- | --- | --- | --- | --- | --- | --- |
| KEGG_STARCH_AND_SUCROSE_METABOLISM | KEGG_STARCH_AND_SUCROSE_METABOLISM | KEGG_STARCH_AND_SUCROSE_METABOLISM | 39 | 0.547004799835274 | 1.87745376007904 | 0.000211149763991849 | 0.0392738561024839 | 0.0333394364197657 | 2295 | tags=54%, list=21%, signal=43% | GSTP1/COX5A/MAP2K1/CTNNA1/ATP1B3/SMUG1/STAG1/INPP1/UQCRC1/IDH3A/BMPR2/UBE3C/PLCB1/HSPA1B/PPP1CC/KRAS/ATP6V1B2/CASP3/UPP1/HLA-DRB3/SUOX |
| KEGG_ENDOMETRIAL_CANCER | KEGG_ENDOMETRIAL_CANCER | KEGG_ENDOMETRIAL_CANCER | 36 | 0.544566630568444 | 1.83558345846079 | 0.000510061049018173 | 0.0412982352719783 | 0.0350579246790987 | 3353 | tags=64%, list=31%, signal=44% | CYC1/TNFSF12/MDH2/KIR3DL2/AP1G1/ALDH3A2/POLR2G/CHUK/MAP3K7/GMPPB/NFKB1/CALM1/DCTN5/PGM2/HLA-DRB3/DAG1/PER2/PRKAG1/SLC25A17/CACYBP/FBXW11/SF3A1/PIK3CB |
| KEGG_TIGHT_JUNCTION | KEGG_TIGHT_JUNCTION | KEGG_TIGHT_JUNCTION | 40 | 0.526205759007095 | 1.81852271189615 | 0.000666100568902876 | 0.0412982352719783 | 0.0350579246790987 | 1914 | tags=45%, list=18%, signal=37% | ALDH1A1/TICAM2/ARPC1A/NDUFA8/MAP2K1/ANAPC11/NRAS/GRB2/ATG7/F2RL1/ITGAM/ATP6V1A/KRAS/COX6A1/NDUFB3/PCCA/NME6/POLR3B |
